# 1 Mismatch repair impedes meiotic crossover interference

2 Tim J. Cooper<sup>1</sup>, Margaret R. Crawford<sup>1</sup>, Laura J. Hunt<sup>1</sup>, Marie-Claude Marsolier-Kergoat<sup>2</sup>, Bertrand Llorente<sup>3</sup> and  
3 \*Matthew J. Neale<sup>1</sup>.

4  
5 1. *Genome Damage and Stability Centre, School of Life Sciences, University of Sussex, UK*

6 2. *CEA/DRF, I2BC/UMR 9198, SBIGeM, Gif-sur-Yvette, France; CNRS-UMR 7026, Éco-anthropologie et*  
7 *Ethnobiologie, Musée de l'Homme, 17, Place du Trocadéro et du 11 Novembre, Paris, France.*

8 3. *Cancer Research Centre of Marseille, CNRS UMR7258, INSERM U1068, Institut Paoli-Calmettes, Aix-Marseille*  
9 *Université UM105, Marseille, France.*

10

## 11 Summary

12 Sequence divergence, mediated by the anti-recombinogenic activity of mismatch repair (MMR), forms a potent  
13 barrier to meiotic recombination and in turn the formation of viable gametes<sup>1-5</sup>. However, exactly how MMR  
14 jeopardizes meiotic success is unclear. Here we utilize a combination of *S. cerevisiae* genetics, genome-wide  
15 mapping of recombination and computational modelling to demonstrate that MMR unexpectedly influences the  
16 global distribution of recombination through preferential suppression of interfering crossovers (COs) at regions of  
17 greater sequence divergence. As a result, inactivation of MMR not only increases the rate of recombination, as  
18 previously observed, but also, paradoxically, the strength of CO interference. Our observations reveal a new  
19 mechanism by which MMR spatially sculpts the meiotic landscape—linking CO control to the mechanisms that  
20 can reproductively isolate a population, and highlighting how genomes may become meiotically incompatible at  
21 the molecular level, dependent upon interactions of the primary DNA sequence.

22

## 23 Introduction & Results

24 Meiosis, a specialized two step nuclear division, is responsible for the generation of genetically diverse, haploid  
25 gametes. An integral feature of the meiotic program is the initiation of homologous recombination and the  
26 subsequent formation of reciprocal, interhomologue exchanges known as crossovers (COs) that are essential for  
27 faithful disjunction of meiotic chromosomes during anaphase I (reviewed in<sup>6,7</sup>). Failure to form at least one CO per  
28 homologue pair risks the formation of aneuploid gametes and thus the process of CO formation is highly regulated.  
29 Within many organisms, including *S. cerevisiae*, *M. musculus*, *H. sapiens* and *A. thaliana*, two subclasses of CO  
30 co-exist. Interfering ZMM (Zip2-Zip3-Zip4-Spo16, Msh4-Msh5, Mer3)-dependent class I COs, which account for

31 the majority of COs formed (~70-85% within *S. cerevisiae*), are dispersed evenly along each chromosome by  
32 means of CO interference—a process that suppresses the formation of COs in proximity to one another. A  
33 subpopulation of recombination events alternatively resolve as non-interfering class II COs dependent upon  
34 Mus81-Mms4, Yen1 or Slx1-Slx4. Homologous recombination, the process responsible for CO formation,  
35 requires a repair template with near-perfect homology<sup>8</sup>. By contrast, recombination between polymorphic,  
36 homoeologous substrates is markedly inefficient, leading to reduced rates of meiotic CO formation, reduced spore  
37 viability and increased chromosomal non-disjunction during meiosis I within hybrid strains of *S. cerevisiae*—  
38 phenotypes linked to incipient speciation and which are largely reversed within MMR-deficient strains<sup>1-4</sup>. Despite  
39 characterization of this anti-recombinogenic activity, a detailed analysis of how MMR alters meiotic recombination  
40 on a genome-wide level has not yet been achieved.

41

42 In order to investigate the impact sequence divergence has upon CO formation, we mapped recombination (Fig.  
43 1a, Methods) within six wild type and 13 MMR-defective *msh2Δ* meioses—obtained from a cross of two widely  
44 utilized laboratory isolates: S288c and SK1<sup>3,9</sup> (~65,000 SNPs, ~4,000 high confidence INDELs, ~0.57%  
45 divergence). Additionally, we re-analyzed datasets comprising 51 wild type<sup>10,11</sup> and four *msh2Δ* tetrads<sup>12</sup> from a  
46 S96 x YJM789 cross of *S. cerevisiae* (~0.6% divergence). On average, we identified  $74.3 \pm 5.4$  and  $105.9 \pm 7.8$   
47 COs per meiosis within our SK1 x S288c wild type and *msh2Δ* samples respectively, corresponding to a significant  
48 1.4-fold increase in CO frequency ( $p < 0.01$ ; Two-sample T-test) (Fig. 1b). A significant *msh2Δ*-dependent increase  
49 (~1.25-fold,  $p < 0.01$ ; Two-sample T-test) is also observed within S96 x YJM789 (Fig. 1b)—collectively reaffirming  
50 the known anti-recombinogenic activity of Msh2<sup>1-5</sup>. Notably, CO frequencies are considerably higher within S96 x  
51 YJM789 than S288c x SK1 (91.4 vs. 74.3 COs per wild type meiosis)—suggesting that cross-specific differences  
52 may exist.

53

54 To investigate any possible effect of Msh2 on CO patterning, we calculated the distribution of inter-crossover  
55 distances (ICDs)—the separation (in bp) between successive COs along every chromosome. To accommodate  
56 comparisons between different sample sizes, ICDs are transformed (Methods and Supplementary Fig. 1) and  
57 visualized in rank order as empirical cumulative distribution functions (eCDFs). CO interference—observed as a  
58 statistically significant ( $p < 0.01$ ; Two-sample Kolmogorov-Smirnov (KS) test) right-ward skew away from conditions  
59 of simulated independence—is present within all mapped strains (Fig. 1c–f) and is stronger within S96 x YJM789  
60 than within S288c x SK1, further suggesting that the meiotic CO landscape is regulated in a cross-specific manner

61 (Supplementary Fig. 2 and Supplementary Discussion). Unexpectedly, inactivation of Msh2 within both hybrid  
62 crosses (Fig. 1c–d) further skews ICD curves to the right ( $p < 0.01$ ; Two-sample KS test)—indicating increased  
63 CO interference. Mutation of a second MMR factor, *PMS1*, which acts downstream of Msh2 mismatch binding,  
64 caused similar increases in both CO frequency and CO interference relative to wild type (Supplementary Fig. 3a—  
65 b), but no additive effect in a double *msh2Δpms1Δ* strain was observed—suggesting that these phenotypes arise  
66 as a general consequence of MMR inactivation.

67

68 To account for any impact increased CO frequency may have upon CO distribution, we utilized an *ndt80AR* strain  
69 where meiotic prophase length is extended via temporary repression of the Ndt80 transcription factor<sup>13,14</sup>. On  
70 average, we identified  $94.5 \pm 16.3$  COs per meiosis within *ndt80AR*—a significant increase relative to wild type  
71 ( $p < 0.01$ ; Two-sample T-test) (Fig. 1b). However, no further increase occurs upon inactivation of Msh2  
72 (*msh2Δndt80AR*,  $97.5 \pm 15.4$  COs,  $p = 0.87$ ; Two-sample T-test) (Fig. 1b). Importantly, despite the lack of change  
73 in CO frequency, the *msh2Δ*-dependent skew in CO distribution was still observed (Fig. 1e) whereas increased  
74 CO frequency alone (*ndt80AR*) does not alter CO distribution compared to wild type (Fig. 1f) ( $p = 0.91$ ; Two-sample  
75 KS test). Inactivation of MMR within hybrid *S. cerevisiae* strains therefore gives rise to two distinct phenotypes  
76 relative to wild type: (i) increased CO frequency, as previously observed<sup>1–4</sup> and (ii) a novel, paradoxical increase in  
77 CO interference—that can arise independently of changes to CO frequency.

78

79 A global increase in CO interference, as observed within *msh2Δ*, may arise when the balance between class I and  
80 class II CO formation is altered. CO distributions are typically modelled by the gamma ( $\gamma$ ) distribution<sup>15,16</sup>, where  
81  $\gamma(\alpha)$  values  $> 1.0$  indicate increasing strength of interference. However, we note that models based on a single ( $\gamma$ )  
82 distribution deviate substantially from experimental data, which contains significantly more ICDs  $< 50$ kb than  
83 expected—indicative of a randomly distributed subpopulation of COs (i.e. class II) (Fig. 2a). To solve and  
84 investigate this problem, we developed computational methods based on ( $\gamma$ )-mixture modelling (Fig. 2b), to  
85 statistically deconvolute ICD data—obtaining estimates of the class I:class II ratio (Methods and Supplementary  
86 Fig. 4). A non-random ( $\gamma(\alpha) > 1.5$ ), and a random ( $\gamma(\alpha) \sim 1.0$ ) component was successfully identified for all  
87 genotypes. Importantly, simulations based on the obtained ratios improve model fit and eliminate the observed  
88 ICD deviations below 50kb (Fig. 2c). Consistent with prior estimates<sup>17</sup>, *MSH2* wild type class I:class II ratios are  
89 estimated at  $\sim 2.0$  and  $\sim 3.0$  within S288c x SK1 and S96 x YJM789 respectively (Fig. 2d). By contrast, deletion  
90 of *MSH2* increases ratio estimates to  $\sim 5$ -6 (Fig. 2d), suggesting a  $\sim 1.7$ -fold increase in class I CO formation in the

91 absence of Msh2 (Fig. 2e). Corresponding *msh2Δ*-dependent decreases in class II CO formation are also  
92 predicted (~0.5-0.7-fold) (Fig. 2f). Our modelling results therefore suggest that the formation of ZMM-dependent  
93 class I COs is preferentially favored within Msh2-deficient cells and that the vast majority of additional COs  
94 observed within *msh2Δ* relative to wild type are class I.

95

96 Zip3 foci specifically mark the sites of interfering, class I COs<sup>18</sup>. In order to verify the results of our modeling, we  
97 counted Zip3 foci within spread, pachytene-arrested hybrid cells (Fig. 3a–b). On average, we identified 34.1-34.7  
98 and 51.7-58.7 foci per meiosis (7-8h timepoints) within *ndt80AR* and *msh2Δndt80AR* respectively, corresponding  
99 to a significant 1.5-fold increase in class I CO formation upon inactivation of MMR ( $p < 0.01$ ; Two-sample T-test).  
100 Such an increase in Zip3 foci count is in agreement with the predictions of our model—strongly implicating Msh2  
101 as a regulator of the class I:class II decision within *S. cerevisiae*.

102

103 MMR machinery forms a potent barrier to homoeologous recombination<sup>1-5</sup>. To understand the interplay between  
104 DNA mismatches and CO formation, we calculated polymorphism densities (SNPs, INDELs)  $\pm 500$  bp around  
105 every mapped CO (Fig. 4a) and compared between genotypes. To generate a comparative reference, the  
106 expected environment for meiotic recombination, as defined by the polymorphism density surrounding ~3600  
107 recombination hotspot midpoints<sup>19</sup>, was also calculated. Polymorphism density surrounding COs within *MSH2*  
108 wild type strains (S288c x SK1: wild type, *ndt80AR*) is significantly different to expected in both distribution  
109 ( $p < 0.01$ ; Two-sample KS test) and in mean variant density (5.32 vs. 6.18,  $p < 0.01$ ; Two-sample T-test)—  
110 characterized by a skew towards COs arising within regions of lower genetic divergence (Fig. 4b). By contrast,  
111 *msh2Δ* COs display statistical similarity to expected ( $p > 0.25$ ; Two-sample KS-test) (6.26 vs. 6.18,  $p = 0.52$ ; Two-  
112 sample T-test) (Fig. 4b), and such a disparity between wild type and *msh2Δ* is recaptured within the independent  
113 S96 x YJM789 cross (Fig. 4c). A similar pattern was observed when considering polymorphism density arising  
114  $\pm 1000$  bp around each CO but was diminished with increasing distance ( $\pm 2000$  bp)—revealing DNA mismatches  
115 to exert a local effect on CO formation (Supplementary Fig. 5a–b and Supplementary Discussion).

116

117 Inactivation of *MSH2* increases CO interference by altering the class I:class II balance (Fig. 2, Fig. 3). To determine  
118 whether the role that Msh2 plays in regulating CO outcome is related to its role in suppressing COs at sites where  
119 mismatches will arise during strand invasion, we further calculated polymorphism densities within mutants that  
120 disrupt class I (*zip3Δ*, *msh4Δ*) or class II (*mms4Δ*) CO formation<sup>12</sup>. Strikingly, mutants devoid of class I COs

121 phenocopy *msh2Δ*—that is, COs within these mutants are no longer skewed away from regions of higher  
122 polymorphism density despite the presence of Msh2 and share mean densities that are not statistically dissimilar  
123 to expected ( $p>0.5$ ; Two-sample T-test) (Fig. 4b–c). Moreover, the impact of *zip3Δ* and *msh2Δ* appears to be  
124 epistatic rather than additive (Fig. 4b), indicating a shared pathway. By contrast, removal of class II formation  
125 (*mms4Δ*) has no impact on the interplay between CO formation and polymorphism density (Fig. 4c)—collectively  
126 suggesting that mismatch-dependent repression of CO formation is class I specific.

127

## 128 Discussion

129 Sequence divergence suppresses recombination within a wide range of eukaryotes including *M. musculus* and  
130 *H. sapiens*<sup>20–22</sup>. Findings presented here expand upon these observations and suggest that the anti-  
131 recombinogenic activity of Msh2, exerted at homoeologous sites, does not mediate an indiscriminate suppression  
132 of COs but rather acts preferentially at sites of ZMM-dependent, interfering COs—thereby altering the spatial  
133 distribution of recombination across the genome by modulating the class I:class II balance (Fig. 4d) and  
134 highlighting how even low rates of divergence, present within intra-specific hybrids of *S. cerevisiae*, can profoundly  
135 impact upon meiosis. Nevertheless, COs frequently encounter heterologous regions (Fig. 4b–c) and yet, despite  
136 this, class I COs still form at a high rate in wild type (67%–75%) (Fig. 2d). Mismatches are therefore unlikely to form  
137 an absolute barrier to interfering COs, but rather influence the *probability* of formation. In our envisioned model  
138 (Fig. 4d), rejected class I events are redirected toward the NCO pathway, via synthesis-dependent strand  
139 annealing (SDSA)<sup>9,23</sup> and double Holliday-junction (dHJ) dissolution<sup>9,24</sup>, or toward inter-sister recombination, which  
140 remains invisible in our assay.

141

142 Inhibition of homoeologous recombination, by means of heteroduplex rejection, relies upon Msh2 and the RecQ-  
143 family helicase, Sgs1<sup>5,25,26</sup>. An *sgs1Δ* mutant may therefore be expected to phenocopy *msh2Δ* if suppression of  
144 class I COs occurs via this mechanism. However, the strength of CO interference is reduced in *sgs1Δ* relative to  
145 wild type (Supplementary Fig. 3c) and the increase in CO interference, observed upon the inactivation of Msh2,  
146 requires Sgs1 (Supplementary Fig. 3d)—suggesting that Msh2 and Sgs1 are not epistatic, but rather antagonistic  
147 in the formation of class I COs. Thus, unexpectedly, Msh2 appears to mediate suppression of class I COs in a  
148 pathway different to that of Sgs1-mediated heteroduplex rejection, instead relying upon the downstream  
149 properties or factors of MMR, including Pms1 (Supplementary Fig. 3a), to achieve its effect.

150

151 Exactly how MMR-specificity for class I COs arises remains unclear. *In vitro* data suggests that Mlh1-Mlh3—  
152 essential class I CO factors—facilitate binding of Msh2 to heteroduplex DNA arising at sites where mismatches  
153 exist between parental strains and are in turn stimulated by Msh2<sup>27</sup>. The distinct genetics of each CO subclass  
154 may therefore be responsible for their differential sensitivity to sequence mismatch, through preferential  
155 recruitment or activation of Msh2 and other MMR components at class I sites. Interestingly, large-scale regions of  
156 heterozygosity promote CO formation within *A. thaliana*<sup>28</sup>—proposed to arise from either increased recombination  
157 due to mismatch-dependent delay in CO maturation, or increased sensitivity of mismatched events to crossover  
158 designation<sup>28</sup>. Given the evolutionary conservation of MMR and class I CO formation<sup>6,29</sup>, our results in *S. cerevisiae*  
159 may distinguish between these mechanisms, suggesting the former is more likely.

160

161 Understanding the molecular mechanisms that contribute to speciation is fundamental to our understanding of  
162 biological diversity and evolution. As class I CO formation is specifically required for correct meiosis I disjunction<sup>6</sup>,  
163 our observations provide a mechanistic insight into how hybrid sterility may arise. Specifically, the activity of Msh2  
164 has the potential to jeopardize chromosome segregation, risking the formation of aneuploid gametes and  
165 rendering hybrids derived from distantly related individuals sub- or infertile—contributing to the sexual isolation of  
166 a population. MMR may therefore not only influence the rates of evolution, favoring more gradual changes to the  
167 gene pool by limiting the amount of genetic exchange that may occur between divergent homologues, but also  
168 serve to promote speciation over evolutionary time.

169

170

171

172

173

174

175

176

177

178

179

180

181 **Contributions**

182 T.J.C, M.C. and M.J.N. conceived of the project. T.J.C. analyzed and interpreted the data, performed in-silico  
183 simulations and designed the mixture modelling algorithm. M.C. performed all genome-wide mapping and event  
184 calling. L.J.H. performed all microscopy and foci analysis. M.M.K. and B.L. provided scripts, protocols and  
185 additional samples. T.J.C. and M.J.N. wrote the manuscript.

186

187 **Competing interests**

188 The authors declare no competing financial interests.

189

190 **Corresponding author**

191 Correspondence to Matthew J. Neale.

192

193

194

195

196

197

198

199

200

201

202

203

204

205

206

207

208

209

210

211 **References**

- 212 1. Greig, D., Travisano, M., Louis, E. J. & Borts, R. H. A role for the mismatch repair system during incipient  
213 speciation in *Saccharomyces*. *J. Evol. Biol.* **16**, 429–37 (2003).
- 214 2. Hunter, N., Chambers, S. R., Louis, E. J. & Borts, R. H. The mismatch repair system contributes to  
215 meiotic sterility in an interspecific yeast hybrid. *EMBO J.* **15**, 1726–33 (1996).
- 216 3. Martini, E. *et al.* Genome-wide analysis of heteroduplex DNA in mismatch repair-deficient yeast cells  
217 reveals novel properties of meiotic recombination pathways. *PLoS Genet.* **7**, e1002305 (2011).
- 218 4. Chambers, S. R., Hunter, N., Louis, E. J. & Borts, R. H. The mismatch repair system reduces meiotic  
219 homeologous recombination and stimulates recombination-dependent chromosome loss. *Mol. Cell. Biol.*  
220 **16**, 6110–20 (1996).
- 221 5. Spies, M. & Fishel, R. Mismatch Repair during Homologous and Homeologous Recombination. *Cold*  
222 *Spring Harb. Perspect. Biol.* **7**, a022657 (2015).
- 223 6. Gray, S. & Cohen, P. E. Control of Meiotic Crossovers: From Double-Strand Break Formation to  
224 Designation. *Annu. Rev. Genet.* **50**, 175–210 (2016).
- 225 7. Berchowitz, L. E. & Copenhaver, G. P. Genetic interference: don't stand so close to me. *Curr. Genomics*  
226 **11**, 91–102 (2010).
- 227 8. Heyer, W.-D., Ehmsen, K. T. & Liu, J. Regulation of Homologous Recombination in Eukaryotes. *Annu.*  
228 *Rev. Genet.* **44**, 113–139 (2010).
- 229 9. Marsolier-Kergoat, M.-C., Khan, M. M., Schott, J., Zhu, X. & Llorente, B. Mechanistic View and Genetic  
230 Control of DNA Recombination during Meiosis. *Mol. Cell* **70**, 9–20.e6 (2018).
- 231 10. Mancera, E., Bourgon, R., Brozzi, A., Huber, W. & Steinmetz, L. M. High-resolution mapping of meiotic  
232 crossovers and non-crossovers in yeast. *Nature* **454**, 479–485 (2008).
- 233 11. Liu, Y. *et al.* Down-Regulation of Rad51 Activity during Meiosis in Yeast Prevents Competition with  
234 Dmc1 for Repair of Double-Strand Breaks. *PLoS Genet.* **10**, e1004005 (2014).
- 235 12. Oke, A., Anderson, C. M., Yam, P., Fung, J. C. & Fishel, R. Controlling Meiotic Recombinational Repair –  
236 Specifying the Roles of ZMMs, Sgs1 and Mus81/Mms4 in Crossover Formation. *PLoS Genet.* **10**,  
237 e1004690 (2014).
- 238 13. Benjamin, K. R., Zhang, C., Shokat, K. M. & Herskowitz, I. Control of landmark events in meiosis by the  
239 CDK Cdc28 and the meiosis-specific kinase Ime2. *Genes Dev.* **17**, 1524–39 (2003).
- 240 14. Xu, L., Ajimura, M., Padmore, R., Klein, C. & Kleckner, N. NDT80, a meiosis-specific gene required for



- 241 exit from pachytene in *Saccharomyces cerevisiae*. *Mol. Cell. Biol.* **15**, 6572–81 (1995).
- 242 15. Chen, S. Y. *et al.* Global Analysis of the Meiotic Crossover Landscape. *Dev. Cell* **15**, 401–415 (2008).
- 243 16. Anderson, C. M., Oke, A., Yam, P., Zhuge, T. & Fung, J. C. Reduced Crossover Interference and  
244 Increased ZMM-Independent Recombination in the Absence of Tel1/ATM. *PLOS Genet.* **11**, e1005478  
245 (2015).
- 246 17. de los Santos, T. *et al.* The Mus81/Mms4 endonuclease acts independently of double-Holliday junction  
247 resolution to promote a distinct subset of crossovers during meiosis in budding yeast. *Genetics* **164**, 81–  
248 94 (2003).
- 249 18. Zhang, L. *et al.* Topoisomerase II mediates meiotic crossover interference. *Nature* **511**, 551–556 (2014).
- 250 19. Pan, J. *et al.* A hierarchical combination of factors shapes the genome-wide topography of yeast meiotic  
251 recombination initiation. *Cell* **144**, 719–31 (2011).
- 252 20. Cole, F., Keeney, S. & Jasin, M. Comprehensive, Fine-Scale Dissection of Homologous Recombination  
253 Outcomes at a Hot Spot in Mouse Meiosis. *Mol. Cell* **39**, 700–710 (2010).
- 254 21. Baudat, F. & de Massy, B. Cis- and trans-acting elements regulate the mouse Psmb9 meiotic  
255 recombination hotspot. *PLoS Genet.* **3**, e100 (2007).
- 256 22. Jeffreys, A. J. & Neumann, R. Factors influencing recombination frequency and distribution in a human  
257 meiotic crossover hotspot. *Hum. Mol. Genet.* **14**, 2277–2287 (2005).
- 258 23. Allers, T. & Lichten, M. Intermediates of yeast meiotic recombination contain heteroduplex DNA. *Mol.*  
259 *Cell* **8**, 225–31 (2001).
- 260 24. Bizard, A. H. & Hickson, I. D. The dissolution of double Holliday junctions. *Cold Spring Harb. Perspect.*  
261 *Biol.* **6**, a016477 (2014).
- 262 25. Sugawara, N., Goldfarb, T., Studamire, B., Alani, E. & Haber, J. E. Heteroduplex rejection during single-  
263 strand annealing requires Sgs1 helicase and mismatch repair proteins Msh2 and Msh6 but not Pms1.  
264 *Proc. Natl. Acad. Sci.* **101**, 9315–9320 (2004).
- 265 26. Goldfarb, T. & Alani, E. Distinct roles for the *Saccharomyces cerevisiae* mismatch repair proteins in  
266 heteroduplex rejection, mismatch repair and nonhomologous tail removal. *Genetics* **169**, 563–74 (2005).
- 267 27. Rogacheva, M. V. *et al.* Mlh1-Mlh3, a Meiotic Crossover and DNA Mismatch Repair Factor, Is a Msh2-  
268 Msh3-stimulated Endonuclease. *J. Biol. Chem.* **289**, 5664–5673 (2014).
- 269 28. Ziolkowski, P. A. *et al.* Juxtaposition of heterozygous and homozygous regions causes reciprocal  
270 crossover remodelling via interference during *Arabidopsis* meiosis. *Elife* **4**, (2015).

271 29. Li, G.-M. Mechanisms and functions of DNA mismatch repair. *Cell Res.* **18**, 85–98 (2008).

272

273

274

275

276

277

278

279

280

281

282

283

284

285

286

287

288

289

290

291

292

293

294

295

296

297

298

299

300

301 **Methods/Supplementary References**

- 302 30. Kane, S. M. & Roth, R. Carbohydrate metabolism during ascospore development in yeast. *J. Bacteriol.*  
303 **118**, 8–14 (1974).
- 304 31. Mortimer, R. K. & Johnston, J. R. Genealogy of principal strains of the yeast genetic stock center.  
305 *Genetics* **113**, 35–43 (1986).
- 306 32. Longtine, M. S. *et al.* Additional modules for versatile and economical PCR-based gene deletion and  
307 modification in *Saccharomyces cerevisiae*. *Yeast* **14**, 953–961 (1998).
- 308 33. Goldstein, A. L. & McCusker, J. H. Three new dominant drug resistance cassettes for gene disruption in  
309 *Saccharomyces cerevisiae*. *Yeast* **15**, 1541–1553 (1999).
- 310 34. Langmead, B. & Salzberg, S. L. Fast gapped-read alignment with Bowtie 2. *Nat. Methods* **9**, 357–359  
311 (2012).
- 312 35. Engel, S. R. & Cherry, J. M. The new modern era of yeast genomics: community sequencing and the  
313 resulting annotation of multiple *Saccharomyces cerevisiae* strains at the *Saccharomyces* Genome  
314 Database. *Database (Oxford)*. **2013**, bat012 (2013).
- 315 36. Van der Auwera, G. A. *et al.* From FastQ Data to High-Confidence Variant Calls: The Genome Analysis  
316 Toolkit Best Practices Pipeline. in *Current Protocols in Bioinformatics* **43**, 11.10.1-11.10.33 (John Wiley  
317 & Sons, Inc., 2013).
- 318 37. Li, H. *et al.* The Sequence Alignment/Map format and SAMtools. *Bioinformatics* **25**, 2078–2079 (2009).
- 319 38. Zhang, L., Liang, Z., Hutchinson, J. & Kleckner, N. Crossover Patterning by the Beam-Film Model:  
320 Analysis and Implications. *PLoS Genet.* **10**, e1004042 (2014).
- 321 39. Do, C. B. & Batzoglu, S. What is the expectation maximization algorithm? *Nat. Biotechnol.* **26**, 897–  
322 899 (2008).
- 323 40. Batten, L. M. & Beutelspacher, A. *The theory of finite linear spaces: combinatorics of points and lines.*  
324 (Cambridge University Press, 1993).
- 325 41. Massey, F. J. & Jr. The Kolmogorov-Smirnov Test for Goodness of Fit. *J. Am. Stat. Assoc.* **46**, 68  
326 (1951).
- 327 42. Miller, L. H. Table of Percentage Points of Kolmogorov Statistics. *J. Am. Stat. Assoc.* **51**, 111 (1956).
- 328 43. Shinohara, M., Oh, S. D., Hunter, N. & Shinohara, A. Crossover assurance and crossover interference  
329 are distinctly regulated by the ZMM proteins during yeast meiosis. *Nat. Genet.* **40**, 299–309 (2008).
- 330 44. Herbert, A. D., Carr, A. M. & Hoffmann, E. FindFoci: A Focus Detection Algorithm with Automated

331 Parameter Training That Closely Matches Human Assignments, Reduces Human Inconsistencies and  
332 Increases Speed of Analysis. *PLoS One* **9**, e114749 (2014).

333 45. Al-Sweel, N. et al. *Mlh3 Mutations in Baker'S Yeast Alter Meiotic Recombination Outcomes By*  
334 *Increasing Noncrossover Events Genome-Wide. PLoS Genetics* **13**, (2017).

335

336

337

338

339

340

341

342

343

344

345

346

347

348

349

350

351

352

353

354

355

356

357

358

359

360

361 **Methods**

362 **Yeast Strains**

363 All *Saccharomyces cerevisiae* strains used in this study are derivatives of SK1<sup>30</sup> and S288c<sup>31</sup>. Hybrid strains,  
364 utilised in genome-wide mapping, were derived from a cross of haploid SK1 and S288c. Strain genotypes are  
365 detailed in (Supplementary Table 1). Knockouts were performed and tested by standard transformation and PCR  
366 techniques<sup>32</sup>. *msh2Δ::kanMX6* and *zip3Δ::HphMX* were generated by PCR mediated gene replacement using a  
367 pFA6a-*kanMX6* or pFA6-*hphMX* plasmid<sup>33</sup>. The *P<sub>GAL</sub>-NDT80::TRP1* allele has the natural *NDT80* promoter  
368 replaced by the *GAL1-10* promoter, and strains include a *GAL4::ER* chimeric transactivator for β-estradiol-induced  
369 expression<sup>13</sup>. S288c x SK1 hybrids create viable spores (91.98% WT, 72.99% *msh2Δ* spore viability, data not  
370 shown), eliminating any observational bias that may arise from assaying a limited, surviving population [Crawford  
371 et al. 2018, DOI pending].

372

373 **Meiotic Timecourse (*ndt80AR* strains)**

374 Diploid strains were incubated at 30°C on YPD plates for 48h. For SK1 diploids, a single colony is inoculated into  
375 4 mL YPD (1% yeast extract, 2% peptone, 2% glucose) and incubated at 30°C at 250 rpm for 24 h. For hybrid  
376 crosses, haploid parental isolates are mated in 1 mL YPD for 8 h. An additional 3 mL of YPD is subsequently  
377 added and the cells are grown for 16 h. Cells are inoculated to a density of (OD600) 0.2 into 30 mL YPA (1%  
378 yeast extract, 2% peptone, 1% K-acetate) and incubated at 250 rpm at 30°C for 14h. Cells are collected by  
379 centrifugation, washed in H<sub>2</sub>O, and resuspended in 30mL pre-warmed sporulation media (2% potassium acetate,  
380 5 µg/mL Adenine, 5 µg/mL Arginine, 5 µg/mL Histidine, 15 µg/mL Leucine, 5 µg/mL Tryptophan, 5 µg/mL Uracil).  
381 The culture is then incubated at 30°C at 250 rpm for the duration of the time course. After 8h, 2mL of the  
382 synchronised cultures were split and exposed to β-estradiol to a final concentration of 2mM, which induces the  
383 transcription of *NDT80* and thus sporulation. Cultures were then incubated to a total of 48 h at 30°C prior to  
384 dissection.

385

386 **Tetrad Dissection**

387 In order to produce hybrid spores for sequencing, SK1 x S288c haploid parents were mated for 8-14 h on YPD  
388 plates, with the exception of *ndt80AR* strains, which are mated and grown in liquid YPD for 24 h (see above).  
389 Haploids are mated freshly on each occasion and not propagated as diploids, in order to reduce mitotic  
390 recombination. Sporulation is induced, and tetrads were dissected after 72 h in 2% potassium acetate. For octads,

391 spores are additionally grown for 4-8 h on YPD plates until a single mitotic division is completed, after which the  
392 mother-daughter pair are separated. Colonies were grown for 16 h within liquid YPD for genomic DNA extraction.  
393 Only tetrads and octads producing four or eight viable spores/colonies, respectively, are considered for  
394 genotyping by NGS.

395

### 396 **NGS Library Preparation**

397 Genomic DNA is purified from overnight, saturated YPD cultures using standard phenol-chloroform extraction  
398 techniques. Samples of genomic DNA are diluted to 0.2-0.3 ng/ $\mu$ L. DNA concentration is measured using the  
399 Qubit High Sensitivity dsDNA Assay. Genomic DNA is fragmented, indexed and amplified via the Nextera XT DNA  
400 library Prep Kit according to the best practices recommended by Illumina. In order to check fragment length  
401 distribution and concentration of purified libraries, 1  $\mu$ L of undiluted library is run on an Agilent Technology 2100  
402 Bioanalyzer using a High Sensitivity DNA chip. To pool samples for sequencing, 5  $\mu$ L of each sample is combined  
403 into a 1.5 mL tube and mixed. 24  $\mu$ L of the mix is transferred to a tube containing 570  $\mu$ L hybridisation buffer. The  
404 mix is boiled at 96°C for 2 minutes and placed in ice water for 5 minutes. 6  $\mu$ L of denatured PhiX control (prepared  
405 according to Illumina protocol, final concentration 1%) is added to the library, mixed well and then loaded into a  
406 MiSeq reagent cartridge. Sequencing was performed in-house using Illumina MiSeq instruments.

407

### 408 **Alignment, SNP and indel Detection**

409 Individual spores were sequenced to an average read-depth of ~45x. Initially, paired-end read FASTQ files are  
410 aligned, via Bowtie2<sup>34</sup>, to the SacCer3 reference genome (v. R64-2-1)<sup>35</sup> using the parameters: -X 1000 —local —  
411 mp 5,1 -D 20 -R 3 -N 1 -L 20 -i S,1,0.50. In order to create a custom SK1 genome to facilitate more accurate  
412 genotype-calling, SNP and indel polymorphisms were detected using the GATK (GenomeAnalysisToolkit) function  
413 *HaplotypeCaller*<sup>36</sup>. An in-house script (*VariantCaller.pl*) subsequently parses the resulting VCF files from 72 spores  
414 to calculate: (i) the call frequency (% of spores any given allele is present within), (ii) the cumulative allelic read  
415 depth (% of reads that contain a specific allele at a specific loci), and (iii) the cumulative total read depth. To identify  
416 legitimate SNPs and indels, variants were filtered for a call-frequency between 44-55%, a total read depth of >250  
417 and an allelic read depth of 95%. Variants within repeat regions, long terminal repeats, retrotransposons and  
418 telomeres were also discarded—yielding a final, robust list of 64,591 SNPs and 3972 indels amounting to ~0.57%  
419 divergence. A custom SK1 genome (SK1\_Mod) is then generated by modifying SacCer3 (v. R64-2-1) to include  
420 all filtered/called SNPs and indels.

## 421 **Genotype-Calling**

422 Spore data from individual samples was aligned to the both the custom SK1\_Mod genome and the SacCer3  
423 reference (see below). Alignment produces a SAM file, which is converted into a sorted BAM file using the  
424 Samtools function, *view*<sup>37</sup>, for downstream processing. The PySamStats (v. 1.0.1, Miles & Mattioni) module,  
425 *variation*, is used to process the sorted BAM file for each sequenced spore, producing a list of the number of  
426 reads containing A/C/T/G, insertion or deletion for each genomic position specified in the S288c and SK1  
427 references. Variant reads are isolated and genotyped using in-house, custom scripts as follows. Genotypes are  
428 assigned according to the rules: (i) A minimum read-depth of 5; (ii) A SNP is called as having the variant genotype  
429 if  $\geq 70\%$  of the reads at that position match the called variant, or as reference if  $\geq 90\%$  of the reads match the  
430 reference; (iii) If the variant and reference reads are above 90% of all reads and within 70% of each other, the  
431 position is called as heteroduplex; (iv) indels are called as having the variant genotype if  $\geq 30\%$  of the reads at  
432 that position match the variant. Such a low threshold is utilised because alignment of indel sequences is biased  
433 towards the reference, which means that they are unlikely to be erroneously called as matching the variant  
434 genotype. For an indel to be called as the reference genotype,  $\geq 95\%$  of the reads must match the reference  
435 sequence and there must be fewer than 2 reads matching the variant call. Any variants that fall below these  
436 thresholds are discarded. Genotype calls are converted into a binary signal, either 1 for S288c or 0 for SK1.

437

## 438 **Event Calling**

439 Using the binarised input, chromosomes are split into segments with the same segregation pattern using scripts  
440 available in<sup>3,9</sup>. Segment types (i.e. 1:7, 2:6, 2:6, 3:5, 4:4, 4:4\*, 5:3, 6:2, 6:2\* or 7:1 as described in<sup>9</sup> are also  
441 recorded. Recombination events are subsequently called as being a set of segments located between two 4:4  
442 segments longer than 1.5 kb<sup>9</sup>. A 4:4 segment corresponds to a Mendelian segregation profile, 5:3 and 3:5  
443 segments to half-conversion tracts and 6:2 and 2:6 segments to full conversion tracts. Each recombination event  
444 can contain between 0-2 COs or NCOs. Events are additionally classified by the number of chromatids involved  
445 (i.e. 1, 2, either sister or non-sister, 3, 4).

446

## 447 **Event Position & Inter-Crossover Distances (ICDs)**

448 Crossover position, or “midpoint”, is defined as the distance between the mid-points of the first and last SNP/indel  
449 markers—an estimate of true event tract length. Inter-crossover distances (ICDs) are then calculated as the  
450 distance (in bp) between successive CO midpoints.

## 451 **Simulating Meiosis**

452 Randomised or mixed (class I + class II) ICD simulations were performed using a novel simulation platform  
453 (*RecombineSim*) built in MATLAB 2018a. A typical simulation run is depicted in (Supplementary Fig. 4a). In brief,  
454 virtual chromosomes are constructed as binned, numerical arrays at a 100 bp resolution adjusted to reflect the  
455 limit of experimental detection governed by the leftmost and rightmost genetic markers (SNPs/indels). Any given  
456 100 bp bin possesses a numerical recombination potential ( $\text{recom}(P)$ ), which governs the ability of an interfering  
457 CO to successfully form at that site. Class I COs impose a zone of “interference”, by altering  $\text{recom}(P)$  values in  
458 adjacent bins in a distance-dependent manner—a similar principle to the beam-film model of CO interference<sup>38</sup>.  
459 The exact shape and width of interference imposed is determined by the best fit ( $\gamma$ ) parameters ( $\alpha, \beta$ ) for the  
460 genotype currently being simulated—and applied as a hazard function (EQN 1.1):

$$461 \quad h(x) = \frac{PDF(x)}{1-CDF(x)} \quad (1.1)$$

462 A hazard function describes the probability that, given a pre-existing CO at position  $x(0)$ , another CO will form at  
463 any given distance ( $x$ ) away<sup>15</sup>—and thus is a natural representation of interference. A fractional amount of class II  
464 COs that remain insensitive to  $\text{recom}(P)$  are introduced via the  $C_{\text{PROB}}$  parameter where necessary. All simulations  
465 ( $N = 10,000$  cells) precisely match the experimentally observed event count for any given genotype or cell. Virtual  
466 event merging, at the 1.5 kb threshold, is included in order to closely match the in vivo data.

467

## 468 **( $\gamma$ )-Mixture Modelling**

469 Distributional analysis of CO distributions is complicated by the existence of non-interfering, Mus81-Mms4 class  
470 II COs—indistinguishable from interfering ZMM-dependent class I COs in our assay. In essence, meiotic ICDs  
471 represent a heterogenous, mixed system (Fig. 2b) with unknown quantities of each subclass. Latent variables (e.g.  
472 class II CO %) may, however, be inferred through probabilistic and statistical methods. Expanding upon the use  
473 of the gamma ( $\gamma$ ) distribution to model meiotic ICDs<sup>15,16</sup>, experimental data was deconvoluted by fitting two ( $\gamma$ )  
474 distributions—one for each subclass of CO—via an expectation maximisation (EM) algorithm (MATLAB 2018a).  
475 EM is a commonly applied method for iterative clustering and parameter estimation in mixed models<sup>39</sup>. Briefly, any  
476 given ICD is assigned a probability reflective of how likely it is to belong to one of the two sub-distributions.  
477 Subsequently, sub-distributions are iteratively shifted and data point identity is reassigned until a maximum  
478 likelihood (ML) solution is converged upon. One ( $\gamma$ ) distribution is expected to yield a final ( $\gamma$ )( $\alpha$ ) value of  $\sim 1.0$  (class  
479 II, random), while the other is expected to produce a ( $\gamma$ )( $\alpha$ ) value of  $> 1.5$  (class I, non-random), with their relative  
480 contributions to the overall mixture (i.e. the class I:class II ratio) is dependent upon genotype. In order to validate



481 this approach, simulated ICD datasets of two component mixtures with known parameters, at variable sample  
482 sizes ( $S$ ), were generated using *RecombineSim* and deconvoluted (Supplementary Fig. 4b). As a measure of  
483 accuracy, the average % difference ( $N(\% \Delta)$ ) between estimated and actual parameters was calculated. Accuracy  
484 is dependent upon sample size ( $S$ ) and to a lesser extent on the relative proportions of each subpopulation—and  
485 thus how likely a subpopulation is to be readily observed within the mixed population. For example, ( $\gamma$ ) mixtures  
486 containing 10 or 25% class II COs exhibit average errors of 10.0% and 9.1% at ( $S$ ) = 500 and 4.53% and 3.73%  
487 at ( $S$ ) = 2000 respectively (Supplementary Fig. 4c). Experimental datasets range from ( $S$ ) values of 354 to 3365,  
488 therefore reasonable error rates of  $\sim < 10\%$  were expected. The ability to mathematically separate CO subclasses  
489 may be of great use to assess, in more detail, the mixed composition of meiotic CO formation present in both  
490 published and future datasets of this type—enabling further identification of those components that directly  
491 influence the CO interference mechanism.

492

### 493 **ICD Transformation**

494 The formation of a variable number of events ( $N$ ) within a finite space (*lim*) (i.e. a chromosome or genome length)  
495 skews CDFs i.e. a higher CO frequency causes a downward shift in ICD size. An ICD distribution produced under  
496 identical spatial rules but with a different event count would therefore generate significantly different CDFs—failing  
497 or biasing statistical testing and undermining the ability to assess distributional agreement. This skew can be  
498 readily observed using simulated data (Supplementary Fig. 1a). Notably, higher values of ( $N$ ) cause a leftward  
499 skew. The relationship between ( $N$ ) and ICD size for a given *lim* is, however, linear<sup>40</sup>. Consequently, in order to  
500 isolate the distributional identity of any given sample (i.e. isolate  $\gamma(\alpha)$  from  $\gamma(\beta)$ ), ICD data can be transformed by  
501 calculating the product of ICD size (ICD  $\times$  event count). Data transformation results in perfectly aligned CDFs  
502 despite varying ( $N$ ), validating this approach (Supplementary Fig. 1b).

503

### 504 **Statistical Analyses**

#### 505 **Kolmogorov-Smirnov Test**

506 A *Kolmogorov-Smirnov* goodness-of-fit (GoF) test is a non-parametric test used to compare continuous  
507 probability distributions in order to assess the null hypothesis that both samples derive from identical populations,  
508 based on their maximal difference ( $D_{KS}$ )<sup>41,42</sup>. ( $P$ ) values of the KS-test effectively describe the probability that, if the  
509 null hypothesis is true, the observed CDFs would be as far apart as observed. ( $P$ ) values may therefore constitute

510 an indirect measure of distributional agreement, as employed throughout this paper. KS-tests were performed  
511 using the MATLAB 2018a packages: *kstest* and *kstest2*.

512

### 513 **Two-sample T-tests**

514 A two-sample T-test is utilised to determine whether a difference in mean value is significant or has arisen by  
515 chance. Two-sample T-Tests were performed using the MATLAB 2018a package: *ttest2*.

516

### 517 **Microscopy & Cytological Analysis**

518 4.5 mL of meiotic culture is spun down on a bench centrifuge and resuspended to 500  $\mu$ L with 1M pH 7.0 D-  
519 Sorbitol. 12  $\mu$ L of 1.0 M DTT and 7  $\mu$ L of 10 mg/mL Zymolyase in 10% glucose solution is added and cells are  
520 spheroplasted by incubation at 37°C for 35-50m with agitation. Spheroplasting success is determined by taking  
521 2-3  $\mu$ L of the aforementioned solution and adding an equivalent volume of 1.0% (w/v) Sodium N-Lauroylsarcosine  
522 while under microscopic observation. Cells should immediately lyse as the exposed membrane is disrupted by  
523 the detergent. 3.5 mL of Stop Solution (0.1M MES, 1 mM EDTA, 0.5 mM MgCl<sub>2</sub>, 1M D-Sorbitol, pH 6.4) is  
524 subsequently added and the cells are spun down to be resuspended in 100  $\mu$ L Spread Solution (0.1M MES, 1  
525 mM EDTA, 0.5 mM MgCl<sub>2</sub>, pH 6.4) and distributed between 4 slides, which are soaked in 70% EtOH overnight  
526 and wiped clean. To each slide, fixative (4.0% (w/v) Formaldehyde, 3.8% (w/v) Sucrose, pH7.5) is added dropwise,  
527 followed by detergent (1% Lipsol, 0.1% Bibby Sterilin) to a ratio of 1:3:6 (suspension : fixative : detergent) before  
528 lightly mixing and incubating for 1m at room temperature (RT). Further fixative is added dropwise to a final ratio of  
529 1:9:6 and the mixture spread across the slide. Each spread is subsequently incubated at RT for 30m in damp  
530 conditions, then allowed to air-dry at RT overnight. Once dry, slides are sequentially washed in 0.2% (v/v) PhotoFlo  
531 Wetting Agent (Kodak) and dH<sub>2</sub>O, and stored at 4°C.

532

533 Slides are washed once in 0.025% Triton X-100 for 10m at RT and twice in PBS for 5m at RT. Slides are blocked  
534 in 5% skimmed milk with PBS for 3h at 37°C. Excess liquid is removed and slides laid horizontally in damp  
535 conditions. 40  $\mu$ L of primary antibody (anti-Zip3<sup>43</sup> from rat at 1:200 and anti-Red1 (Genecust, affinity purified,  
536 raised against aa(426-827)) from rabbit at 1:200) in 1% skimmed milk with PBS is added under coverslips. Slides  
537 are incubated at 4°C overnight (15.5h) and washed three times in PBS for 5m at RT. Excess liquid is then removed  
538 and slides are returned to damp conditions. 40  $\mu$ L of secondary antibody (anti-rat AlexaFluor555 at 1:200 and  
539 anti-rabbit AlexaFluor488 at 1:500) in 1% skimmed milk with PBS is added under coverslips. Slides are incubated

540 at RT for 2.5h and then washed three times with PBS for 5m at RT. Cover slips are affixed using Vectashield  
541 mounting medium with DAPI, sealed with clear varnish and imaged on an Olympus IX71 ( $z = 0.2\mu\text{M}$ , Exposure  
542 times: TRITC-mCherry = 0.2s, eGFP = 1.0s, DAPI = 0.1s). Images were randomised, deconvoluted via Huygens  
543 (software) and foci were automatically counted using an in-house plugin for ImageJ (FindFoci) as previously  
544 described<sup>44</sup>, with an appropriate mask to discard signals outside of nuclei.

545

#### 546 **Data Availability**

547 Raw sequence data is deposited in the NIH Sequence Read Archive (SRA) under accession numbers SRP152953  
548 (*zip3Δ*), SRP151982 (wild type, *msh2Δ*, *ndt80AR*) and SRP111430 (*msh2Δ*). Scripts, tools, software and  
549 additional data are available upon request or at [GitHub repository link].

550

551

552

553

554

555

556

557

558

559

560

561

562

563

564

565

566

567

568

569

570 **Supplementary Discussion**

571 **The SK1-ML3 allele has a reduced capacity to generate CO interference**

572 As previously noted, wild type CO frequencies are higher within S96 x YJM789 (74.3 vs 97.3 COs/meiosis) than  
573 S288c x SK1 (Fig. 1b). Moreover, wild type CO interference is significantly stronger within S96 x YJM789 ( $p < 0.01$ ;  
574 Two-sample KS test) (Supplementary Fig. 2a) and ( $\gamma$ )-mixture modelling results (Fig. 2d) suggest that class I CO  
575 fraction is higher in S96 x YJM789 (75% vs. 67%). Molecular incompatibilities between certain alleles of the CO  
576 formation or CO interference machinery may account for these cross-specific differences. To investigate this  
577 hypothesis further, we analysed the frequency and distribution of COs within a *mlh3* $\Delta$  S288c x YJM789  
578 background containing a functional copy of the SK1 *MLH3* allele (*SK1-MLH3*)<sup>45</sup>. Surprisingly, introduction of the  
579 SK1 *MLH3* allele is sufficient to reduce the global strength of CO interference and produce a CO distribution  
580 identical to that of S288c x SK1 wild type ( $p = 0.91$ ; Two-sample KS Test) (Supplementary Fig. 2b). *SK1-MLH3*  
581 also results in a modest but significant ( $p < 0.01$ ; Two-sample T-test) reduction in CO frequency (97.2 vs. 90.9  
582 COs per meiosis) (Supplementary Fig. 2c). Collectively, these results suggest that, in some manner, the SK1  
583 *MLH3* allele is deficient in the generation of CO interference and/or CO-formation—however, the reduction in CO  
584 frequency observed within S288c x SK1 cannot be fully ascribed to SK1 *MLH3* alone. In the context of this study,  
585 such a defect improves the visibility of the *msh2* $\Delta$  phenotype in S288c x SK1 (Fig. 1c–d).

586

587 **Localised impact of polymorphism density upon CO formation**

588 S288c x SK1 variants have an average density of 1 per 175 bp and a median inter-variant distance of 81 bp  
589 (93.12% of inter-variant distances are  $< 500$ bp) and are therefore evenly spaced and present at high density across  
590 each chromosome. Maps of polymorphism density are shown in (Supplementary Fig. 5c–d) for two example  
591 chromosomes. In general, S288c x SK1 chromosomes are organised into local peaks and troughs of variant  
592 density while maintaining overall uniformity. Therefore, it seems unlikely that inactivation of Msh2 would result in a  
593 gross-redistribution of CO formation toward any particular region of the chromosome as it may do within  
594 organisms with less uniform SNP/indel density, such as *A. thaliana*<sup>28</sup>. To further investigate the way in which  
595 polymorphisms sculpt the meiotic landscape, we repeated the analysis shown in (Fig. 4b–c) using expanded  
596  $\pm 1000$ bp and  $\pm 2000$ bp windows (Supplementary Fig. 5a–b). A Msh2-dependent and statistically significant skew  
597 toward regions of lower sequence divergence ( $p < 0.01$ ; Two-sample KS test) is retained at  $\pm 1000$ bp but is  
598 significantly diminished at  $\pm 2000$ bp ( $p = 0.51$ ; Two-sample KS test), suggesting that mismatched sequences have  
599 the greatest impact when present within the recombination intermediate structures.

600 **Figure Legends**

601 **Fig. 1 | Inactivation of Msh2 increases CO frequency and the global strength of CO interference**

602 **a**, Genome-wide mapping of recombination. Meiosis is induced within hybrid S288c x SK1 *S. cerevisiae* diploid  
603 cells and genomic material is prepped from individual, isolated spores for paired-end Illumina sequencing in order  
604 to genotype SNP/INDEL patterns and therefore determine the parental origin of any given loci (Methods). Only a  
605 single chromosome is shown for clarity. Inter-crossover distances (ICDs), a measure of CO interference, are  
606 calculated as the distance (in bp) between successive COs along a given chromosome. **b**, Average number of  
607 COs per meiosis for each genotype. The number of individual meioses sequenced per genotype is indicated. Error  
608 bars: 95% confidence intervals (CI). *P* values: *Two-sample T-test*. **c–f**, Empirical cumulative distribution functions  
609 (eCDFs) showing the fraction of ICDs at or below a given size. The total number of experimental ICDs is indicated  
610 in brackets. ICDs are transformed as per the protocol described to correct for skews generated by differing CO  
611 frequencies (Methods). Untransformed ICD plots are available in (Supplementary Fig. 1c–h). Randomized  
612 datasets were generated via simulation to represent a state of no interference (Methods). Pairwise goodness-of-  
613 fit tests were performed between genotypes as indicated (triangular legend). *P* values: *Two-sample KS-test*.

614

615 **Fig. 2 | Computational modelling predicts a Msh2-dependent shift in the class I:class II CO ratio**

616 **a**, Ratio of experimentally observed ICD sizes (OBS) versus the theoretical expectation based on a single, best-fit  
617 gamma ( $\gamma$ )-distribution (EXP). Ratio values were calculated at 5kb intervals. **b**, Example ( $\gamma$ ) mixture model ( $\alpha 1.0$ -  
618  $\beta 1.0 + \alpha 3.0 \beta 5.0$ ). I = class I. II = class II. Meiotic datasets, owing to the existence of two CO subclasses, are a  
619 heterogenous population of three ICD types (as shown). **c**, As in (a) but based on a mixed ( $\gamma$ )-model (no. of  
620 distributions fitted = 2). **d**, Best-fit ( $\gamma$ ) mixture modelling results. N = sample size (no. of ICDs).  $\alpha$  = Single-fit  $\gamma(\alpha)$   
621 value.  $P_{\gamma}$  = Fit quality of a single ( $\gamma$ )-distribution (one-sample KS-test).  $\alpha$ /II = Mixed model  $\gamma(\alpha)$  values. Class I/II =  
622 estimated fraction of each CO subclass. Ratio = class I:class II.  $P_{\gamma}$  = Fit quality of a mixed ( $\gamma$ )-mode (Two-sample  
623 KS-test) **e–f**, Estimated class I and class II CO counts respectively. Estimates were obtained using the best-fit  
624 class I:class II ratios. Total CO frequencies are overlaid (grey bar). Error bars: 95% confidence intervals (CI). The  
625 number of individual meioses sequenced per genotype is indicated.

626

627 **Fig. 3 | Zip3 foci counts are significantly elevated within Msh2-deficient cells**

628 **a**, Box-and-whisker plot showing Zip3 foci counts from spread, pachytene arrested, Red1-positive S288c x SK1  
629 cells. Midlines denote median values. *P* values: *Two-sample T-test*. **b**, Representative example for each genotype

630 (7h timepoint). Cells are fluorescently labelled for the meiosis-specific axis protein Red1 (green), the interfering CO  
631 marker, Zip3 (red) and DNA (blue). Only cells with sufficient Red1 signal, as determined by the relative intensity of  
632 Red1 foci above the background, were included in the analysis. The total number of nuclei counted is indicated  
633 in brackets.

634

#### 635 **Fig. 4 | Suppression of class I COs occurs at regions of higher sequence divergence**

636 **a**, SNP/INDEL count is assayed using a  $\pm 500$ bp window centered on CO or DSB hotspot midpoints. All contained  
637 SNP/INDELS are then subsequently tallied, with equal weight. **b–c**, Empirical cumulative distribution functions  
638 (eCDFs) showing the fraction of COs that reside within a region of a given SNP/INDEL count for S288c x SK1 and  
639 S96 x YJM789 respectively. Expected is calculated using DSB hotspot midpoints<sup>19</sup>. Pairwise goodness-of-fit tests  
640 were performed between pooled *msh2* $\Delta$  and *MSH2*<sup>+</sup> datasets as indicated (triangular legend). P values: Two-  
641 sample KS-test. **d**, Model summarizing the impact Msh2-dependent regulation has upon CO formation. In the  
642 presence of Msh2 or a functional MMR pathway, regions of higher sequence divergence redirect repair toward  
643 the NCO or inter-sister pathways. Inactivation of MMR alleviates this repression, increasing the frequency of class  
644 I CO formation and thus the global strength of CO interference.

645

#### 646 **Supplementary Fig. 1 | CO interference is present to varying degrees within all mapped strains**

647 **a**, Empirical cumulative distribution function (eCDF) showing ICD data derived from interfering simulations ( $\gamma(\alpha) =$   
648 3.0) at varying CO per cell frequencies (N). **b**, As in **(a)** but ICDs are transformed as per the protocol described to  
649 correct for skews generated by differing CO frequencies (Methods). **c–h**, eCDFs showing the fraction of ICDs at  
650 or below a given size. The total number of experimental ICDs is indicated in brackets. Randomized datasets were  
651 generated via simulation to represent a state of no interference (Methods). Pairwise goodness-of-fit tests were  
652 performed between genotypes as indicated (triangular legend). P values: Two-sample KS-test.

653

#### 654 **Supplementary Fig. 2 | Cross-specific differences—the SK1-MLH3 allele has reduced capacity to mediate** 655 **CO interference**

656 **a–b**, Empirical cumulative distribution functions (eCDFs) showing the fraction of ICDs at or below a given size.  
657 The total number of experimental ICDs is indicated in brackets. ICDs are transformed as per the protocol  
658 described to correct for skews generated by differing CO frequencies (Methods). Randomized datasets were  
659 generated via simulation to represent a state of no interference (Methods). Pairwise goodness-of-fit tests were

660 performed between genotypes as indicated (triangular legend). A schematic of the *SK1-MLH3* strain analyzed is  
661 shown. P values: Two-sample KS-test. **c**, Average number of COs per meiosis for each genotype. P values: Two-  
662 sample T-test.

663

### 664 **Supplementary Fig. 3 | Mechanistic details of MMR-dependent suppression of interfering COs**

665 **a**, Empirical cumulative distribution function (eCDF) showing the fraction of ICDs at or below a given size. The total  
666 number of experimental ICDs is indicated in brackets. ICDs are transformed as per the protocol described to  
667 correct for skews generated by differing CO frequencies. Randomized datasets were generated via simulation to  
668 represent a state of no interference (Methods). Pairwise goodness-of-fit tests were performed between genotypes  
669 as indicated (triangular legend). P values: Two-sample KS-test. **b**, Average number of COs per meiosis for each  
670 genotype. The number of individual meioses sequenced per genotype is indicated. Error bars: 95% confidence  
671 intervals (CI). P values: Two-sample T-test. **c—d**, As in **(a)** but for differing genotypes.

672

### 673 **Supplementary Fig. 4 | Modelling CO distributions.**

674 **a**, *RecombineSim* overview. Virtual chromosomes are constructed at a 100bp resolution as binned, numerical  
675 arrays upon which meiotic CO formation is simulated (Methods). Any given 100bp contains a value in the range  
676 of [0.0-1.0], designating its recombination potential (Rec(P)). Prior to CO formation, bins are initially populated with  
677 [1.0]—denoting an equal probability of class I CO formation. During the formation of an interfering CO,  
678 *RecombineSim* imposes CO interference as a distance-dependent zone of repression by modifying Rec(P)  
679 values—influencing the position of all subsequent interfering COs. Non-interfering, class II COs are distributed  
680 randomly independently of Rec(P) and do not impose CO interference. Successive events falling within a set  
681 threshold of one another (e.g. 1.5kb) are merged into a single event residing at the midpoint position. These  
682 processes repeat until a pre-determined number of simulated ICDs are obtained. **b**, Gamma ( $\gamma$ ) mixture modelling  
683 was utilised to resolve and estimate individual components of simulated two component mixtures with known  
684 parameters ( $\alpha, \beta$ ), at known weights ( $W$ )—generated via *RecombineSim*. A set of representative examples are  
685 shown. Percentage differences between actual and estimated parameters are calculated and averaged to  
686 estimate error rate ( $N(\% \Delta)$ ) and algorithm accuracy.  $S$  = number of ICDs. **c**, Error rate ( $N(\% \Delta)$ ) values for three ( $\gamma$ )  
687 mixtures calculated at varying sample size ( $S$ ).

688

689

690 **Supplementary Fig. 5 | Localised impact of polymorphism density upon CO formation.**

691 **a–b**, Empirical cumulative distribution functions (eCDFs) showing the fraction of COs that reside within a region  
692 ( $\pm 1000$ bp and  $\pm 2000$ bp respectively) of a given SNP/INDEL count (S288c x SK1 only). Expected is calculated  
693 using DSB hotspot midpoints<sup>19</sup>. Pairwise goodness-of-fit tests were performed between pooled *msh2* $\Delta$  and  
694 *MSH2*<sup>+</sup> datasets as indicated (triangular legend). P values: Two-sample KS-test. **c–d**, Smoothed SNP/INDEL  
695 density maps for S288c x SK1 ChrVI and ChrVII respectively.

696

697

698

699

700

701

702

703

704

705

706

707

708

709

710

711

712

713

714

715

716

717

718

719



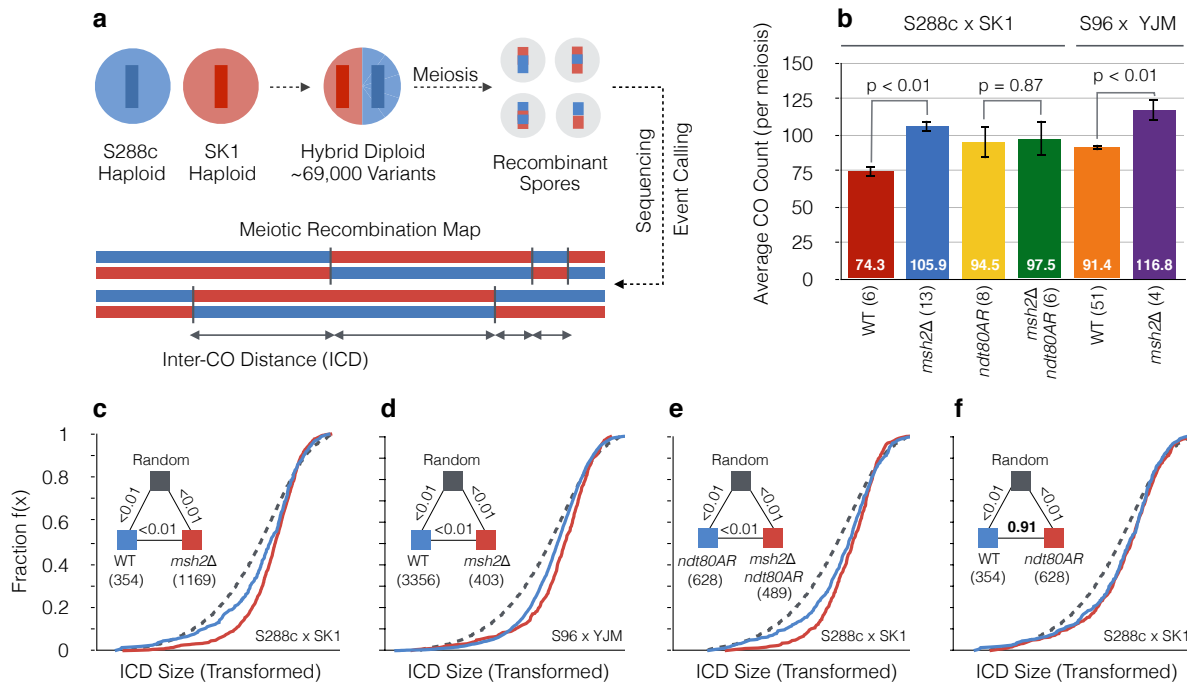

**Fig. 1 | Inactivation of Msh2 increases CO frequency and the global strength of CO interference**

**a**, Genome-wide mapping of recombination. Meiosis is induced within hybrid S288c x SK1 *S. cerevisiae* diploid cells and genomic material is prepped from individual, isolated spores for paired-end Illumina sequencing in order to genotype SNP/INDEL patterns and therefore determine the parental origin of any given loci (Methods). Only a single chromosome is shown for clarity. Inter-crossover distances (ICDs), a measure of CO interference, are calculated as the distance (in bp) between successive COs along a given chromosome. **b**, Average number of COs per meioses for each genotype. The number of individual meioses sequenced per genotype is indicated. Error bars: 95% confidence intervals (CI). *P* values: *Two-sample T-test*. **c–f**, Empirical cumulative distribution functions (eCDFs) showing the fraction of ICDs at or below a given size. The total number of experimental ICDs is indicated in brackets. ICDs are transformed as per the protocol described to correct for skews generated by differing CO frequencies (Methods). Untransformed ICD plots are available in (Supplementary Fig. 1c–h). Randomized datasets were generated via simulation to represent a state of no interference (Methods). Pairwise goodness-of-fit tests were performed between genotypes as indicated (triangular legend). *P* values: *Two-sample KS-test*.

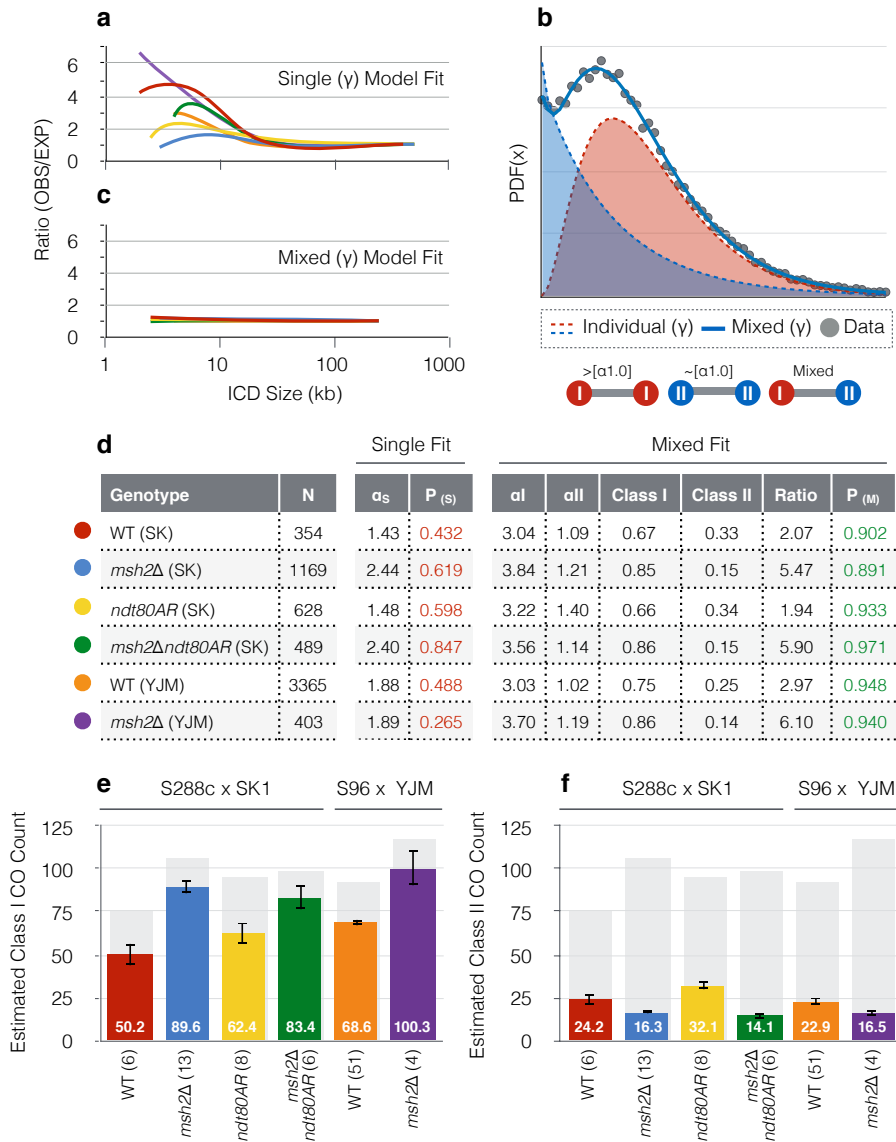

**Fig. 2 | Computational modelling predicts a Msh2-dependent shift in the class I:class II CO ratio**

**a**, Ratio of experimentally observed ICD sizes (OBS) versus the theoretical expectation based on a single, best-fit gamma ( $\gamma$ )-distribution (EXP). Ratio values were calculated at 5kb intervals. **b**, Example ( $\gamma$ ) mixture model ( $\alpha 1.0\text{-}\beta 1.0 + \alpha 3.0\beta 5.0$ ). I = class I. II = class II. Meiotic datasets, owing to the existence of two CO subclasses, are a heterogenous population of three ICD types (as shown). **c**, As in (**a**) but based on a mixed ( $\gamma$ )-model (no. of distributions fitted = 2). **d**, Best-fit ( $\gamma$ ) mixture modelling results. N = sample size (total number of ICDs).  $\alpha_s$  = Single-fit  $\gamma(\alpha)$  value.  $P_{(s)}$  = Fit quality of a single ( $\gamma$ )-distribution (one-sample KS-test).  $\alpha I/II$  = Mixed model  $\gamma(\alpha)$  values. Class I/II = estimated fraction of each CO subclass. Ratio = class I:class II.  $P_{(m)}$  = Fit quality of a mixed ( $\gamma$ )-mode (Two-sample KS-test) **e—f**, Estimated class I and class II CO counts respectively. Estimates were obtained using the best-fit class I:class II ratios. Total CO frequencies are overlaid (grey bar). Error bars: 95% confidence intervals (CI). The number of individual meioses sequenced per genotype is indicated.

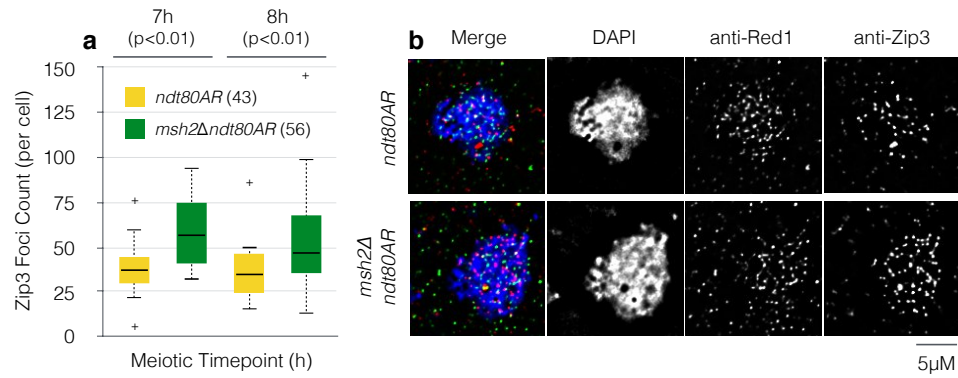

**Fig. 3 | Zip3 foci counts are significantly elevated within Msh2-deficient cells**

**a**, Box-and-whisker plot showing Zip3 foci counts from spread, pachytene arrested, Red1-positive S288c x SK1 cells. Midlines denote median values. *P* values: *Two-sample T-test*. **b**, Representative example for each genotype (7h timepoint). Cells are fluorescently labelled for the meiosis-specific axis protein Red1 (green), the interfering CO marker, Zip3 (red) and DNA (blue). Only cells with sufficient Red1 signal, as determined by the relative intensity of Red1 foci above the background, were included in the analysis. The total number of nuclei counted is indicated in brackets.

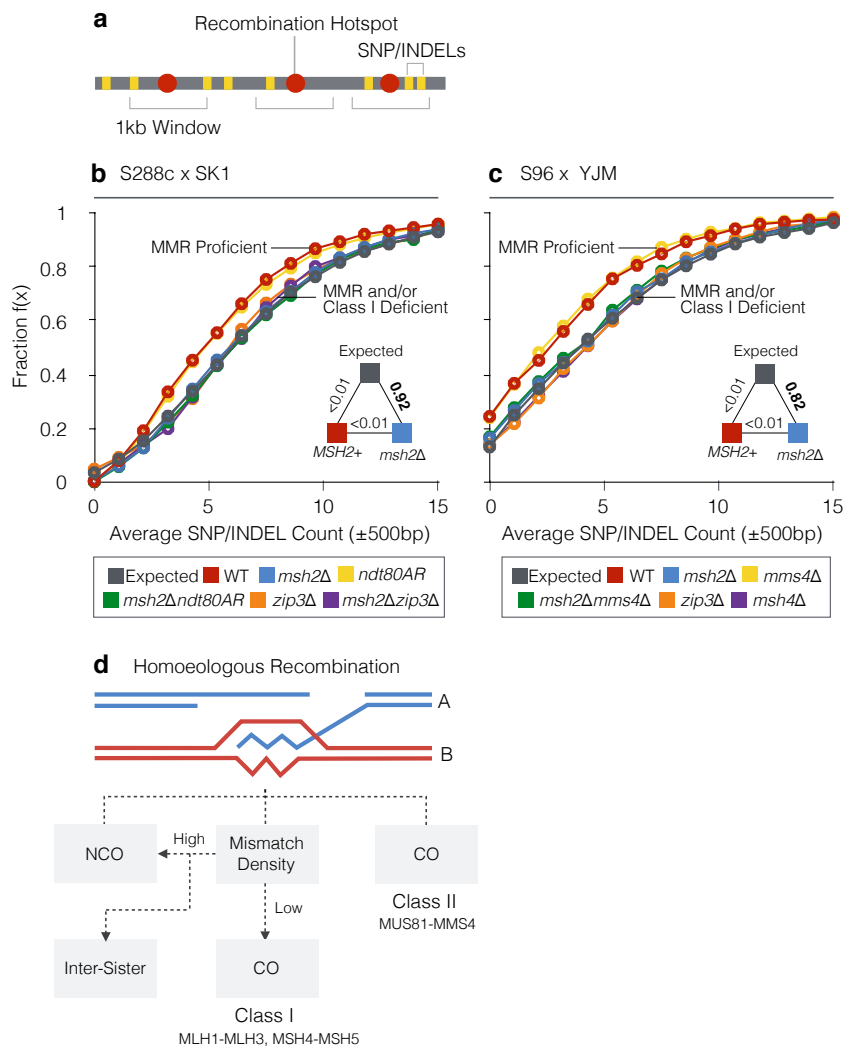

**Fig. 4 | Suppression of class I COs occurs at regions of higher sequence divergence**

**a**, SNP/INDEL count is assayed using a  $\pm 500$ bp window centered on CO or DSB hotspot midpoints. All contained SNP/INDELs are then subsequently tallied, with equal weight. **b–c**, Empirical cumulative distribution functions (eCDFs) showing the fraction of COs that reside within a region of a given SNP/INDEL count for S288c x SK1 and S96 x YJM789 respectively. Expected is calculated using DSB hotspot midpoints<sup>18</sup>. Pairwise goodness-of-fit tests were performed between pooled *msh2* $\Delta$  and *MSH2*<sup>+</sup> datasets as indicated (triangular legend). P values: Two-sample KS-test. **d**, Model summarizing the impact Msh2-dependent regulation has upon CO formation. In the presence of Msh2 or a functional MMR pathway, regions of higher sequence divergence redirect repair toward the NCO or inter-sister pathways. Inactivation of MMR alleviates this repression, increasing the frequency of class I CO formation and thus the global strength of CO interference.

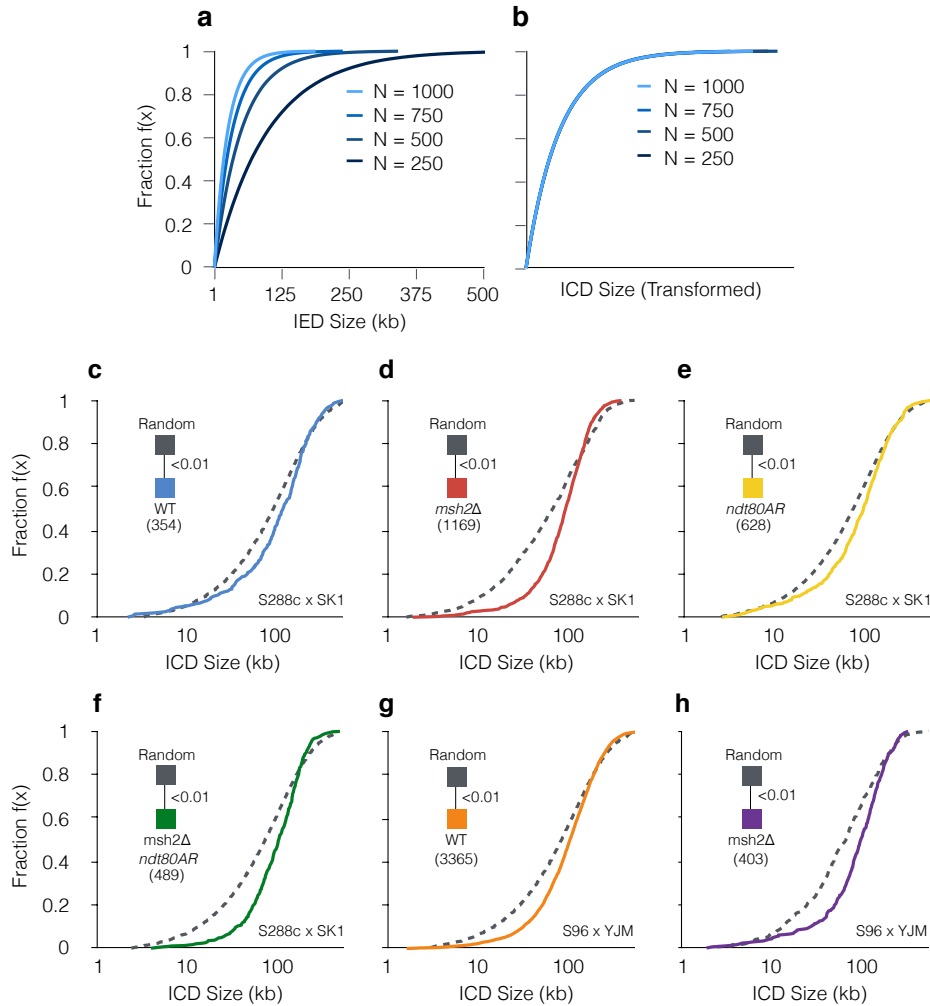

**Supplementary Fig. 1 | CO interference is present to varying degrees within all mapped strains**

**a**, Empirical cumulative distribution function (eCDF) showing ICD data derived from interfering simulations ( $\gamma(\alpha) = 3.0$ ) at varying CO per cell frequencies ( $N$ ). **b**, As in (**a**) but ICDs are transformed as per the protocol described to correct for skews generated by differing CO frequencies (Methods). **c–h**, eCDFs showing the fraction of ICDs at or below a given size. The total number of experimental ICDs is indicated in brackets. Randomized datasets were generated via simulation to represent a state of no interference (Methods). Pairwise goodness-of-fit tests were performed between genotypes as indicated (triangular legend). P values: Two-sample KS-test.

**FIGURE S1**

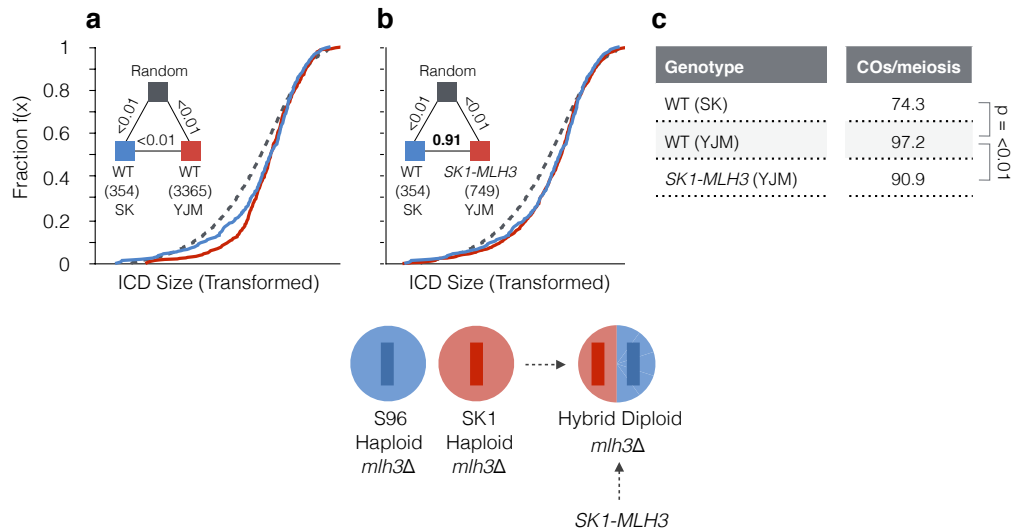

**Supplementary Fig. 2 | Cross-specific differences—the SK1-MLH3 allele has reduced capacity to mediate CO interference**

**a–b**, Empirical cumulative distribution functions (eCDFs) showing the fraction of ICDs at or below a given size. The total number of experimental ICDs is indicated in brackets. ICDs are transformed as per the protocol described to correct for skews generated by differing CO frequencies (Methods). Randomized datasets were generated via simulation to represent a state of no interference (Methods). Pairwise goodness-of-fit tests were performed between genotypes as indicated (triangular legend). A schematic of the SK1-MLH3 strain analyzed is shown. P values: Two-sample KS-test. **c**, Average number of COs per meiosis for each genotype. P values: Two-sample T-test.

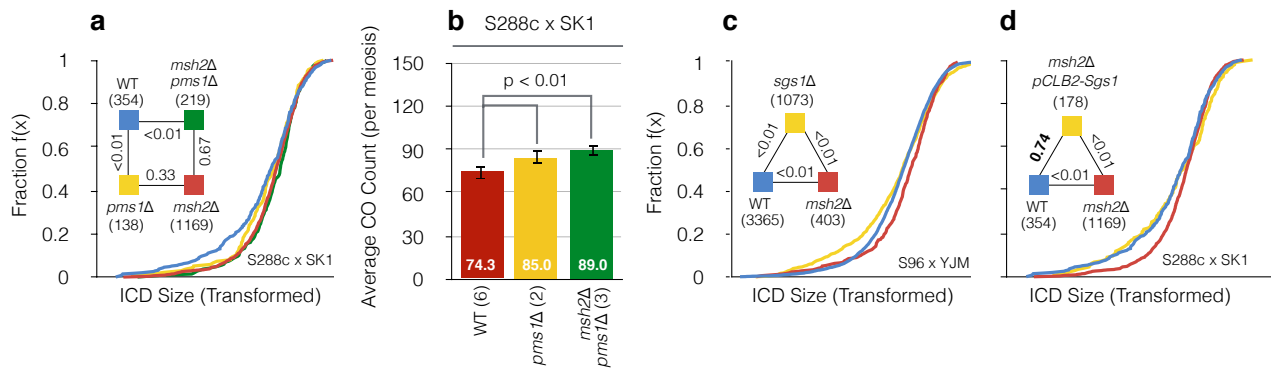

### Supplementary Fig. 3 | Mechanistic details of MMR-dependent suppression of interfering COs

**a**, Empirical cumulative distribution function (eCDF) showing the fraction of ICDs at or below a given size. The total number of experimental ICDs is indicated in brackets. ICDs are transformed as per the protocol described to correct for skews generated by differing CO frequencies (Methods). Randomized datasets were generated via simulation to represent a state of no interference (Methods). Pairwise goodness-of-fit tests were performed between genotypes as indicated (triangular legend). P values: Two-sample KS-test. **b**, Average number of COs per meiosis for each genotype. The number of individual meioses sequenced per genotype is indicated. Error bars: 95% confidence intervals (CI). P values: Two-sample T-test. **c**–**d**, As in **(a)** but for differing genotypes.

FIGURE S3

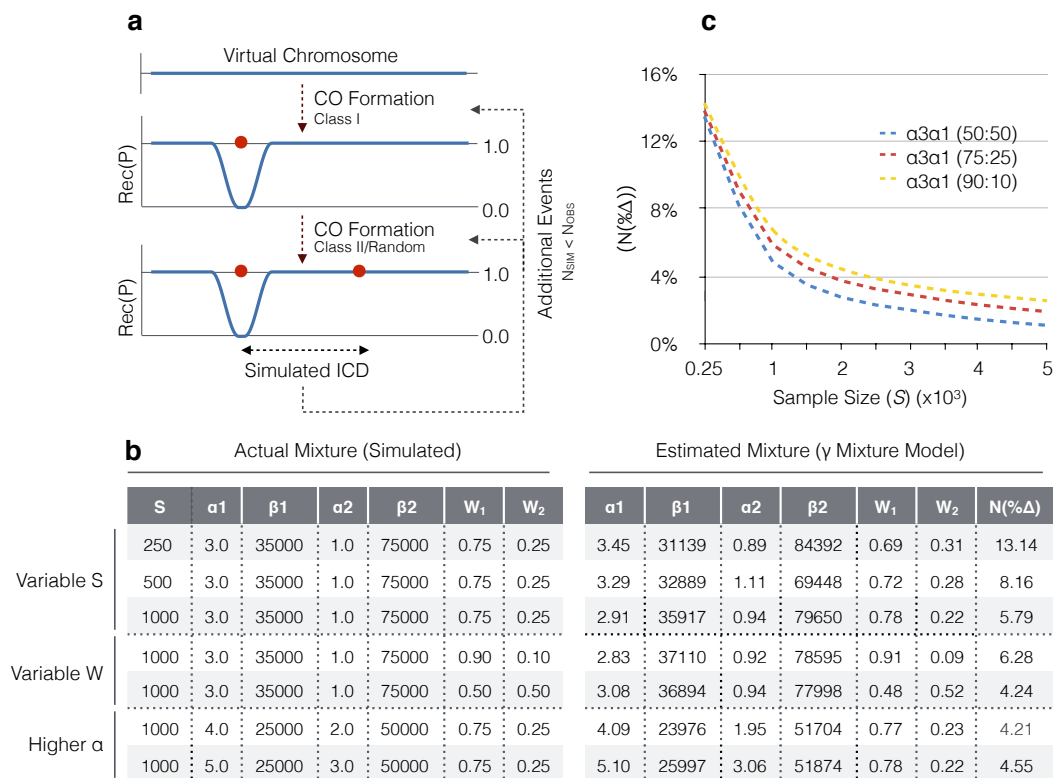

**Supplementary Fig. 4 | Modelling CO distributions.**

**a**, *RecombineSim* overview. Virtual chromosomes are constructed at a 100bp resolution as binned, numerical arrays upon which meiotic CO formation is simulated (Methods). Any given 100bp contains a value in the range of [0.0-1.0], designating its recombination potential (Rec(P)). Prior to CO formation, bins are initially populated with [1.0]—denoting an equal probability of class I CO formation. During the formation of an interfering CO, *RecombineSim* imposes CO interference as a distance-dependent zone of repression by modifying Rec(P) values—influencing the position of all subsequent interfering COs. Non-interfering, class II COs are distributed randomly independently of Rec(P) and do not impose CO interference. Successive events falling within a set threshold of one another (e.g. 1.5kb) are merged into a single event residing at the midpoint position. These processes repeat until a pre-determined number of simulated ICDs are obtained. **b**, Gamma ( $\gamma$ ) mixture modelling was utilised to resolve and estimate individual components of simulated two component mixtures with known parameters ( $\alpha, \beta$ ), at known weights ( $W$ )—generated via *RecombineSim*. A set of representative examples are shown. Percentage differences between actual and estimated parameters are calculated and averaged to estimate error rate (N(% $\Delta$ )) and algorithm accuracy. S = number of ICDs. **c**, Error rate (N(% $\Delta$ )) values for three ( $\gamma$ ) mixtures calculated at varying sample size (S).

**FIGURE S4**



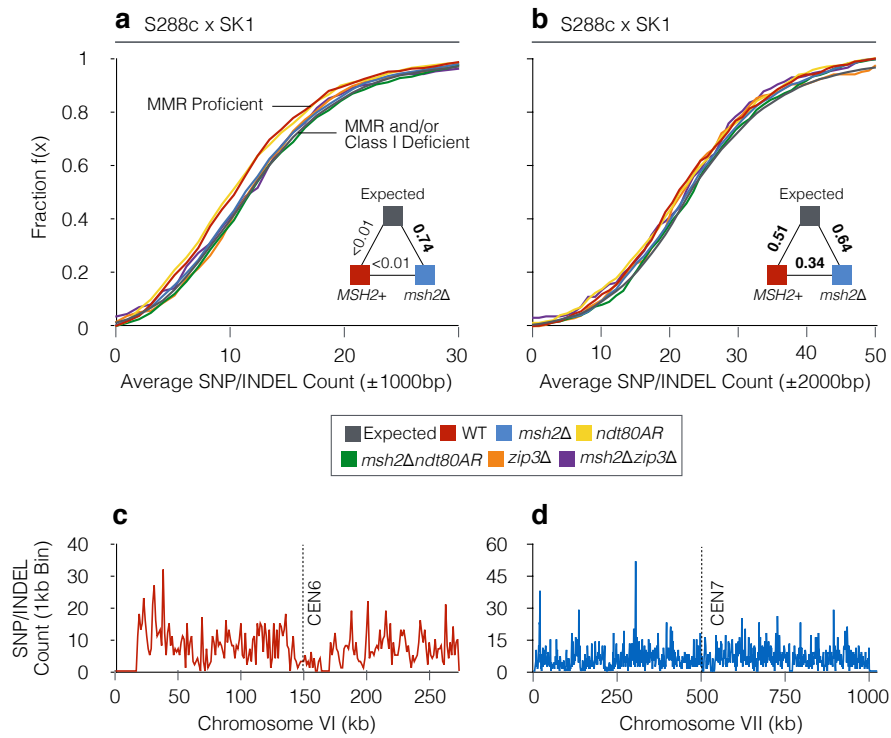

**Supplementary Fig. 5 | Localised impact of polymorphism density upon CO formation.**

**a—b**, Empirical cumulative distribution functions (eCDFs) showing the fraction of COs that reside within a region ( $\pm 1000\text{bp}$  and  $\pm 2000\text{bp}$  respectively) of a given SNP/INDEL count (S288c x SK1 only). Expected is calculated using DSB hotspot midpoints<sup>18</sup>. Pairwise goodness-of-fit tests were performed between pooled  $msh2\Delta$  and  $MSH2^+$  datasets as indicated (triangular legend). P values: Two-sample KS-test. **c—d**, Smoothed SNP/INDEL density maps for S288c x SK1 ChrVI and ChrVII respectively.

| Genotype            | Strain | Background | Mat | Genotype                                                                                                                      |
|---------------------|--------|------------|-----|-------------------------------------------------------------------------------------------------------------------------------|
| WT                  | MJ513  | SK1        | a   | <i>ho::LYS2 lys2Δ leu2Δ arg4Δ</i>                                                                                             |
|                     | MJ600  | S288c      | α   | <i>ade8Δ</i>                                                                                                                  |
| <i>msh2Δ</i>        | MC26   | SK1        | α   | <i>ho::LYS2 lys2Δ ura3Δ arg4 leu2 msh2Δ::Kan</i>                                                                              |
|                     | MC49   | S288c      | a   | <i>ade8Δ msh2Δ::Kan</i>                                                                                                       |
| <i>ndt80AR</i>      | MJ43   | SK1        | α   | <i>ho::LYS2 lys2Δ arg4Δ leu2Δ::hisG trp1Δ::hisG his4XΔ::LEU2 nuc1Δ::LEU2 PGAL1-NDT80::TRP1 ura3::pGPD1-GAL4(848)-ER::URA3</i> |
|                     | MC42   | S288c      | a   | <i>ade8Δ ndt80Δ::Kan</i>                                                                                                      |
| <i>msh2Δndt80AR</i> | MC298  | SK1        | a   | <i>ho::LYS2 lys2Δ ura3Δ arg4 leu2 trp1Δ::hisG ura3Δ::PGPD1-GAL4(848)-ER::URA3 PGAL1-NDT80::TRP1 msh2Δ::Kan</i>                |
|                     | MC300  | S288c      | α   | <i>ade8Δ ndt80Δ::Kan msh2Δ::Kan</i>                                                                                           |
| <i>zip3Δ</i>        | MC322  | SK1        | α   | <i>ho::LYS2 lys2Δ ura3Δ arg4 leu2 zip3Δ::HphMX4</i>                                                                           |
|                     | MC313  | S288c      | a   | <i>ade8Δ zip3Δ::HphMX4</i>                                                                                                    |
| <i>msh2Δzip3Δ</i>   | MC326  | SK1        | α   | <i>ho::LYS2 lys2Δ ura3Δ arg4 leu2 msh2Δ::Kan zip3Δ::HphMX4</i>                                                                |
|                     | MC317  | S288c      | a   | <i>ade8Δ msh2Δ::Kan zip3Δ::HphMX4</i>                                                                                         |

**Supplementary Table 1 | Strain Table (S288c x SK1).**
